# Supplementary material for: Phenotype Enhancement Screen of a Regulatory spx Mutant Unveils a Role for the ytpQ Gene in the Control of Iron Homeostasis
Source: PLoS One. 2011 Sep 20;6(9):e25066. doi: 10.1371/journal.pone.0025066 (PMC3176815; doi:10.1371/journal.pone.0025066)
Supplement: Table S3 — Induction and repression of genes under control conditions and in response to methylglyoxal in the spx and ytpQ mutants as revealed by transcriptome analyses. The transcriptome datasets included log2-fold expression changes of average values of three transcriptome replicates according to Table S2. All induced and repressed genes under control and methylglyoxal stress were listed and classified into regulons according to http://dbtbs.hgc.jp and SubtiWiki database (http://subtiwiki.uni-goettingen.de/wiki/index.php/Main_Page). These data were used for the hierarchical clustering analysis presented in Figures 5 and 6. (XLS) [file pone.0025066.s008.xls]

## Sheet: spx-ytpQ-cluster-complete-11010
UNIQUE-ID	SPX-CO	YTPQ-CO	YTPQ-MG
CymR * cysK	2.16853	-0.39862	0.575961
CymR * ssuA	7.85875	0.174956	-0.192552
CymR * ssuB	8.51285	0.254852	0.239761
CymR * ssuC	9.2395	0.207277	-0.0121941
CymR * ssuD	10.0039	0.169006	-0.0100375
CymR * ytmI	10.2313	-0.741172	-0.191173
CymR * ytmJ	10.1579	-0.409789	-0.575579
CymR * ytmO	8.60608	-0.0474279	-0.968464
CymR * ytmK	9.85322	-0.177409	-0.589384
CymR * ytmL	9.64283	0.0400695	-0.660224
CymR * ytmM	9.41255	0.333622	-0.639168
CymR * ytmN	8.22449	0.182146	-0.995036
CymR * ytnI	8.19561	0.121488	-0.504339
CymR * ytnJ	9.87428	-0.000841818	-0.784259
CymR * ytnL	9.17851	0.134133	-0.884567
CymR * ytnM	7.51437	0.264616	-0.753782
CymR * ribR	9.09044	0.139046	-0.268701
CymR * ytlI	3.85711	-0.478326	0.529971
CymR * yrrT	3.24768	0.1003	0.874842
CymR * yrhA	3.39492	-0.339248	0.387822
CymR * yrhB	3.69063	-0.205109	0.0579377
CymR * yrhC	2.55022	0.769642	0.303966
CatR * yfiD	2.5383	-0.645608	-0.886486
CatR * yfiE	2.33964	-0.716102	-0.977923
HxlR * hxlA	2.186	0.947636	0.729966
HxlR * hxlB	2.32826	0.934048	1.25236
LexA * dinB	2.6495	1.77788	0.483571
LexA * yhjD	1.20011	1.64567	0.0506433
LexA * yneA	0.877095	2.08277	-0.204582
PerR * ahpC	2.86492	2.73155	2.6627
PerR * ahpF	2.39883	1.8741	2.15495
PerR * katA	5.43522	3.52103	4.15554
PerR * mrgA	2.27618	0.519663	1.08745
Fur * dhbA	4.35596	4.76517	5.48351
Fur * dhbB	4.675	4.66905	5.25238
Fur * dhbC	4.59688	4.65242	5.43093
Fur * dhbE	4.53471	4.2136	4.74863
Fur * dhbF	4.06927	4.16795	4.54815
Fur * feuA	3.72467	1.73653	2.59431
Fur * feuB	2.69015	1.25466	1.88795
Fur * feuC	2.61731	1.08078	1.72527
Fur * fhuB	0.677014	0.888731	1.81727
Fur * fhuC	1.11146	1.11298	1.63389
Fur * fhuD	2.54457	2.32217	3.25906
Fur * ydbN	4.56276	3.83952	4.47908
Fur * yfmC	0.640578	1.44568	2.33015
Fur * yfiY	1.38644	1.56738	2.13202
Fur * ykuN	4.63308	3.68671	4.46802
Fur * ykuO	4.6054	3.63419	4.66001
Fur * ykuP	4.39488	3.49003	4.37968
Fur * yxeB	3.3347	2.36849	3.60698
Fur * ybbA	2.77633	1.26623	1.81297
Fur * ybbB	1.70674	0.762329	2.07024
Fur * ybbF	0.894071	-0.348905	1.81961
Fur * ybbH	0.797173	-0.0162299	1.61355
Fur * yuiI	3.66897	2.81878	4.28271
Fur * yusV	1.24651	0.495941	1.73691
Fur * ywbL	4.91929	0.868668	1.66428
ComK * comC	3.02948	1.15433	2.88391
ComK * comEA	3.14855	1.44846	2.08518
ComK * comEC	2.29091	0.850141	0.629249
ComK * comER	4.26863	-0.976078	-0.422282
ComK * comFA	4.26813	1.70889	2.09241
ComK * comFB	2.66594	1.02747	0.883
ComK * comFC	2.73681	0.959486	0.911635
ComK * comGA	4.74913	2.14699	2.94441
ComK * comGB	4.74368	2.03476	2.83699
ComK * comGC	4.85597	1.92702	2.89567
ComK * comGD	4.73414	1.85879	2.77717
ComK * comGE	4.64649	1.86227	2.75989
ComK * comGF	4.86205	1.92001	3.20413
ComK * comGG	4.70046	1.712	2.97762
ComK * comK	4.05461	1.90343	2.40072
ComK * sacV	3.09182	2.22715	2.88137
ComK * nin	4.13228	1.30357	1.93381
ComK * nucA	3.40297	1.11761	1.77827
G * sigG	2.37955	0.0262571	0.365177
G * ybdK	1.71594	0.818264	0.941442
G * ybdN	2.73509	1.23666	1.22899
G * ycgL	3.04396	-1.0195	-0.149323
G * ycgM	1.82684	-0.526362	-0.435111
G * ydcO	3.09194	2.1513	2.20878
G * ydcP	3.16661	2.96328	3.30677
G * ydcQ	3.18522	2.90574	2.9681
G * ydcR	3.22091	2.96216	2.88885
G * ydcS	3.17109	3.06496	2.83489
G * ydcT	2.89882	2.75417	2.56097
G * yddA	2.69256	2.81079	2.08295
G * yddB	2.2479	1.84985	1.63913
G * yddC	3.21609	2.94549	2.62498
G * yddD	3.26585	3.32761	2.87809
G * yddE	2.51818	2.30792	1.86517
G * yddF	2.45345	1.85328	2.51615
G * yddG	2.87912	2.62448	2.23546
G * yddI	1.8588	1.99976	1.47388
G * yfhE	2.21081	-0.782778	0.036712
G * yitE	5.15105	-1.15771	-0.188085
G * yndA	5.40271	-1.25736	-0.311793
G * yoaR	1.64477	-0.996772	0.000802877
G * yusN	2.27938	-1.39303	-0.0727912
G * yveA	1.82324	-0.567511	0.237425
G * yvnA	1.88621	0.477266	1.05683
F * sigF	2.73673	-0.63286	-0.63026
F * yetF	2.13112	-0.234737	0.349618
F * yetG	1.86055	1.34824	2.6622
F * yhfM	1.94549	-0.731222	0.255726
F * yhfN	2.39578	-0.474218	-0.288071
F * yhfW	2.14731	-0.0785434	1.14035
F * yisN	2.22929	-0.421857	-0.288223
F * yqxA	2.43736	-0.802512	-0.441347
F * yqzE	3.06268	0.754688	1.12791
F * yqzG	1.58747	-0.436907	0.739739
F * yrrR	1.85348	-0.663473	-0.514353
F * ytfI	3.55759	-1.24266	-0.0751805
F * ytfJ	4.06857	-1.27359	0.487634
F * ywnJ	3.17141	0.445688	0.636234
F * ywpH	6.89305	2.44159	3.60356
F * yyaC	4.15484	-0.879215	0.0423782
D * cheA	0.510084	1.88053	1.5161
D * cheB	0.48124	1.84955	1.21121
D * cheC	0.506348	2.0172	1.73298
D * cheD	0.648996	1.99144	1.76124
D * cheW	0.47853	1.87344	3.6558
D * cheV	1.62914	2.52217	1.63354
D * cheY	1.08954	2.22518	1.83174
D * degR	0.665372	1.47213	2.21709
D * epr	1.67326	3.97828	3.7252
D * lytA	1.19434	1.94383	2.36524
D * lytB	0.855639	2.09847	2.58084
D * lytC	0.694622	2.02351	2.50516
D * lytD	1.48878	2.6878	3.36375
D * lytF	2.0028	3.03858	3.17639
D * flgE	0.881871	2.43008	1.87861
D * flgK	1.86792	2.16946	2.65444
D * flgL	1.82467	2.24667	2.46811
D * flgM	2.75186	2.73258	3.19767
D * flhA	1.7666	2.04701	1.30827
D * flhB	1.60841	1.92056	1.34649
D * flhF	1.63052	2.05613	1.37874
D * flhO	1.3262	2.3031	2.39605
D * flhP	1.03911	2.20886	2.51585
D * fliD	1.7666	2.81975	2.95461
D * fliE	0.183662	1.69117	1.31852
D * fliJ	0.761515	2.34001	1.7583
D * fliK	0.678135	2.43743	1.73849
D * fliL	0.485993	2.288	1.55112
D * fliM	0.59607	2.12265	1.55641
D * fliP	1.22355	2.29187	1.6855
D * fliQ	0.859514	2.05463	1.41553
D * fliR	0.772038	2.10584	1.44717
D * fliS	1.60841	2.85077	3.28974
D * fliT	1.63052	2.99439	3.50942
D * fliY	0.997909	2.03595	1.38642
D * fliZ	1.12876	2.10109	1.60585
D * hag	4.82835	5.82371	5.25324
D * hemAT	2.12302	#N/A	2.99001
D * mcpA	1.3435	3.3649	3.30109
D * mcpB	0.71635	2.55894	2.82125
D * mcpC	1.49254	3.2525	2.99817
D * motA	1.59064	3.5659	3.64715
D * motB	1.65798	3.57789	3.73292
D * tlpA	1.92248	3.36916	3.23517
D * tlpB	0.602172	3.86024	3.29592
D * tlpC	1.19093	2.33192	1.60748
D * ybdO	1.40944	2.26591	2.70789
D * yfmS	1.70442	3.56561	3.50348
D * yfmT	1.75107	3.48189	3.3803
D * yjcP	1.30963	2.72492	3.03802
D * yjcQ	1.14714	1.69123	1.98618
D * yjfB	2.64254	3.75636	4.05077
D * ylqB	3.32321	3.61661	3.98852
D * ylxF	0.69436	2.51409	1.77292
D * ylxG	0.93135	2.56937	1.95594
D * ylxH	0.334755	1.91486	1.24474
D * yoaH	0.970871	3.10552	3.46263
D * yscB	1.33164	3.18138	3.22323
D * yvaQ	0.146416	1.35196	1.86719
D * yvyC	1.95284	2.74934	2.93742
D * yvyF	2.34634	1.88593	2.37356
D * yvyG	2.09098	2.34288	2.84059
D * ywtD	1.6545	3.54466	4.02735
D * yjbJ	0.942286	1.94057	2.40316
E * citH	2.73157	-0.97329	-0.43413
E * cotE	4.55762	-1.55449	-1.3258
E * cotJA	6.00163	-2.48372	-2.08222
E * cotJB	4.66995	-1.93674	-1.26933
E * cotJC	5.69375	-2.45124	-2.30829
E * ctaD	1.18531	-1.73367	-0.964705
E * cwlD	2.79727	-0.901877	-1.11556
E * cydB	2.71001	-0.127279	-0.164998
E * cydC	3.35584	-0.404554	-0.391046
E * cydD	3.74159	-0.16558	-0.204759
E * cypA	2.52936	-0.763154	-0.26349
E * cypX	1.82844	0.271338	-0.00544441
E * dacB	3.71642	-0.791325	-1.64464
E * gerM	4.87314	-1.12159	-0.731238
E * glnH	5.15396	-0.50982	0.133682
E * glnM	5.16566	-0.799613	0.634918
E * glnP	4.75703	-0.566791	0.625813
E * glnQ	5.11375	-0.545557	-0.356058
E * kamA	3.14941	-1.30997	-0.477255
E * mmgA	1.86939	-0.89117	-0.823916
E * mmgB	2.13044	-1.57745	-0.734219
E * mmgC	2.02691	-1.24234	-0.732956
E * mmgE	1.71343	-1.00467	-0.504625
E * phoB	2.08359	-0.124943	0.148804
E * prkA	5.05804	-1.49666	-0.919888
E * proH	2.20241	-0.581835	0.0342251
E * rsfA	5.07321	-0.26446	1.02699
E * safA	2.00294	0.552689	0.202265
E * sigE	3.32414	-0.438614	-0.160384
E * sodF	4.14185	-1.22694	-0.175843
E * spmA	4.15648	-1.02633	-1.80882
E * spmB	3.54272	-1.1772	-1.97506
E * spoIIAA	2.85126	-0.809238	-0.651919
E * spoIIAB	2.74695	-0.708789	-0.710535
E * spoIIB	2.57202	-0.0589087	0.717675
E * spoIID	1.91915	-0.887429	-0.92387
E * spoIIGA	3.50459	-0.413474	-0.021985
E * spoIIIAA	4.40669	-1.11282	-1.18308
E * spoIIIAB	3.7754	-1.23083	-1.05178
E * spoIIIAC	4.3639	-1.34955	-0.945064
E * spoIIIAD	4.72256	-1.24416	-0.755576
E * spoIIIAE	4.51954	-1.13891	-0.537271
E * spoIIIAF	4.67842	-1.12607	-0.493879
E * spoIIIAG	4.99935	-1.05497	-0.507856
E * spoIIIAH	4.92987	-1.14552	-0.54848
E * spoIIID	4.4504	-1.8371	-0.747302
E * spoIIM	3.51926	-0.436093	-0.164534
E * spoIIP	2.77688	-0.783183	-0.449625
E * spoIIQ	5.28949	-0.57827	-0.152719
E * spoIVA	3.83822	-1.80903	-1.47718
E * spoIVB	0.497645	-2.08964	-1.31101
E * spoIVCB	2.2226	-0.926637	0.253792
E * spoIVFA	3.80754	-0.804795	-0.855179
E * spoIVFB	3.06211	-0.619396	-0.590223
E * spoVB	3.02519	0.0309105	0.195289
E * spoVD	2.16814	-1.01082	-1.09488
E * spoVG	1.78398	0.0624948	0.248345
E * spoVID	4.15192	-1.94181	-1.29638
E * spoVK	1.97446	-2.00062	-1.37005
E * spoVM	3.0761	-1.02767	-0.472523
E * spoVR	3.92275	-0.245204	0.498356
E * spoVS	2.48984	-0.529739	-0.925202
E * sqhC	3.66204	-1.16214	-0.361342
E * sspC	0.611396	-4.03489	-3.9412
E * usd	4.68195	-1.75438	-1.03928
E * yaaH	3.75892	-1.07528	-0.271223
E * yabS	2.47171	-0.825875	-0.641244
E * yabT	2.24521	-0.783498	-0.683468
E * ybaN	3.85661	-1.0187	-0.529746
E * yclF	1.81003	-0.601635	-0.779249
E * ydcC	4.10325	-0.393621	-0.429835
E * ydhD	2.01463	-1.07519	-1.14112
E * ydhF	1.81387	-0.151287	0.0757973
E * ydjP	2.2551	-0.551014	0.0433072
E * yeaA	2.57862	-0.162181	0.387866
E * yflJ	2.10949	-0.180468	0.154648
E * yhaL	3.07508	-0.498926	-0.599703
E * yhaX	4.53854	-1.46737	-0.437864
E * yhbB	1.95524	-1.40571	-1.64452
E * yhbH	1.75058	-0.530239	-0.259703
E * yheC	4.80871	-0.9352	0.265301
E * yheD	4.39217	-0.722706	1.22284
E * yhxC	4.30469	-1.39664	-0.251665
E * yjaV	3.59785	-1.53352	-1.18262
E * yjbE	3.58664	0.204763	0.276346
E * yjbF	3.0197	0.75909	0.211394
E * yjbX	3.80522	-1.71397	-0.88888
E * yjcA	3.28244	-1.15869	-0.403211
E * yjdG	1.70977	0.380803	0.434853
E * yjdH	4.72836	-0.923651	-0.181793
E * yjfA	3.70642	-0.133664	1.14906
E * yknT	5.69989	-0.460628	0.472768
E * yknU	2.10049	-0.842887	0.895884
E * yknV	1.9874	-0.909309	0.728019
E * ykpC	3.7702	-0.265715	0.199412
E * ykvU	4.13608	-0.591245	-0.054682
E * ykvV	2.19818	-0.43937	-0.054682
E * ylaK	3.34793	-1.12848	-0.546526
E * ylbJ	3.48884	-0.542234	0.221803
E * ylbO	3.43257	-1.14921	-0.873776
E * yloB	3.31787	-1.21808	-1.09259
E * ymaF	4.51912	-1.14328	0.0641701
E * ymxH	3.38765	-1.31792	-0.865937
E * yncD	2.1604	-0.229005	0.4564
E * yngE	2.68974	-0.343989	0.280034
E * yngF	3.34596	-0.798107	-0.172251
E * yngG	3.63982	-0.989554	-0.404815
E * yngH	3.58211	-1.09804	-0.485102
E * yngI	4.03518	-1.33868	-0.630282
E * yngJ	4.11819	-1.52004	-0.751498
E * yobW	2.77742	-0.80164	-0.197898
E * yocM	1.63554	-0.151528	-0.782025
E * yocN	3.75906	-0.709277	0.121701
E * yodP	3.49029	-1.15154	-0.637042
E * yodQ	1.99173	-1.15664	-0.685346
E * yodS	3.44274	-1.67803	-1.24973
E * yodT	3.91452	-1.4822	-0.818003
E * yozD	3.43267	-0.917806	-0.759022
E * yozN	4.1958	-0.751319	-0.0323149
E * yqfC	3.47029	-1.47038	-1.03058
E * yqfD	2.84656	-0.80498	-0.618244
E * yqfT	2.19345	-0.906467	-0.128188
E * yrzE	5.4122	-0.461853	0.307153
E * ysxE	4.71704	-1.73626	-1.22991
E * ytrI	3.95398	-0.395125	-0.00909837
E * ytxC	1.71781	-0.303365	-0.442177
E * yuzC	3.48937	-0.896218	-0.204959
E * ywcA	1.71904	-1.0431	-1.06646
E * yxeD	1.6511	-1.14108	-0.422147
E * yycN	1.62768	-0.267722	0.0631992
H * cah	3.68995	-0.526113	0.332752
H * glgA	2.17318	-1.65432	-1.19262
H * glgB	3.01289	-1.60086	-1.02558
H * glgC	2.90274	-1.505	-1.03861
H * glgD	2.4461	-1.5114	-1.1139
H * glgP	2.7488	-1.11859	-0.096283
H * phrA	2.53014	0.761197	0.495992
H * phrE	2.40873	0.893215	1.28998
H * phrG	1.65118	0.230129	0.266429
H * phrI	1.9381	0.620483	1.34537
H * phrK	1.62916	1.01798	0.521205
H * ymaH	1.59042	-0.0616264	0.257011
H * yobN	4.03672	-0.11615	0.502426
H * yobO	2.30572	-0.0929863	0.187257
H * yojL	2.07259	0.454439	1.44195
H * yttP	2.34793	0.272704	0.129617
H * ywfB	3.16985	1.50569	2.37195
H * ywfC	2.29129	0.800761	0.779621
H * ywfD	2.13237	0.683499	0.786044
H * ywfE	2.15875	0.620527	0.570524
H * ywfF	1.59657	0.159608	0.675509
H * ywfG	1.61372	0.253735	0.393065
CodY * yurM	1.99108	1.4698	1.89583
CodY * yurN	2.55301	1.48602	2.28717
CodY * yurO	3.50867	1.6081	2.57587
CodY * yurP	3.49948	1.81932	2.59137
CodY * hutG	-1.08912	2.66604	2.2586
CodY * hutH	-2.19355	3.08223	2.84392
CodY * hutI	-1.41647	2.79187	2.6041
CodY * hutM	-0.911533	2.24246	1.6153
CodY * hutU	-2.31919	2.97506	2.78002
CodY * yxbA	2.96061	1.36538	2.46458
CodY * yxbB	3.04328	1.53085	2.49833
CodY * yxbC	2.75421	1.05959	1.74513
CodY * dppB	1.18171	0.5187	1.95548
CodY * dppC	1.65766	0.19973	1.89585
CodY * yuiA	1.41661	1.96749	1.57886
CodY * yxnB	2.73774	1.30676	2.20752
CodY * asnH	2.60564	1.0062	2.31151
Rok * bdbA	2.31996	-5.10433	-2.79492
Rok * bdbB	1.73022	-4.80659	-2.94838
Rok * sunA	2.51971	-5.4946	-4.30272
Rok * sunT	2.3632	-6.10913	-3.79519
Rok * yolJ	2.04228	-7.48208	-6.00787
SinR * sipW	3.10095	-0.169253	-0.911316
SinR * tasA	4.28467	-0.620165	-0.96044
SinR * yqxM	2.76833	0.0263468	-1.06982
SinR * yveK	1.84279	-0.504782	-1.25585
SinR * yveL	2.0167	-0.456372	-1.20778
SinR * yveM	1.88662	-0.283761	-0.0479746
SinR * yveN	1.84827	-0.500953	-0.274838
SinR * yveO	1.61519	-0.607814	-0.416731
SinR * aprE	2.18593	0.140412	0.39069
SinR * yvfE	1.69374	-0.61249	-0.806872
SinR * yvfF	2.08538	-0.444583	-0.366603
Spo0A * sinI	2.2701	0.354433	0.458791
Spo0A * ybcO	3.75285	-1.23094	-0.204034
Spo0A * ybcP	1.95388	-1.16262	-0.510998
Spo0A * ybcS	1.69544	-1.17614	-0.514985
Spo0A * yuaB	2.382	-0.550543	0.0174041
Spo0A * yvaW	2.75481	-0.304404	0.627924
Spo0A * yvaX	3.07369	-0.0534238	0.92671
Spo0A * yvaY	3.1654	-1.00264	-0.168166
Spo0A * yxaM	2.27169	0.899036	1.47656
Spo0A * yoaW	2.60596	0.289055	0.390378
SPbeta * xepA	1.88226	2.2132	2.31073
SPbeta * xhlA	2.87703	3.22525	3.29716
SPbeta * xhlB	3.18893	3.56537	3.60574
SPbeta * xkdB	1.01433	1.7032	1.40715
SPbeta * xkdC	0.835606	1.81701	1.51206
SPbeta * xkdD	0.807819	1.2846	1.39518
SPbeta * xkdE	1.44769	2.27663	2.14773
SPbeta * xkdF	2.11688	2.90696	2.72303
SPbeta * xkdG	2.27698	2.78739	2.77311
SPbeta * xkdH	2.28649	2.75931	2.75872
SPbeta * xkdI	1.90423	2.4461	2.55084
SPbeta * xkdJ	2.36361	2.81925	2.87212
SPbeta * xkdK	2.48542	2.84117	2.87111
SPbeta * xkdM	2.81711	3.10013	3.18543
SPbeta * xkdN	2.4535	2.8469	2.72877
SPbeta * xkdO	1.20834	1.89663	2.04896
SPbeta * xkdP	2.02468	1.95769	2.02933
SPbeta * xkdQ	2.08898	2.40709	2.42251
SPbeta * xkdS	0.925212	1.74335	1.66487
SPbeta * xkdT	1.14612	1.76432	1.8076
SPbeta * xkdU	1.74544	2.16752	2.06985
SPbeta * xkdV	2.12986	2.37338	2.33766
SPbeta * xkdW	2.36507	2.54653	2.56367
SPbeta * xkdX	2.14361	2.78746	2.60203
SPbeta * xlyA	2.45081	2.68171	2.66868
SPbeta * xpf	1.58486	3.08673	2.41778
SPbeta * xtmA	2.44506	3.36193	3.05038
SPbeta * xtmB	2.2582	3.19285	2.80041
SPbeta * xtrA	1.10259	2.24756	1.82499
SPbeta * yokA	0.26752	-5.63308	-5.5933
SPbeta * yokB	0.262012	-2.12961	-2.22814
SPbeta * yokC	0.107755	-7.18687	-5.60964
SPbeta * yokD	0.942098	-4.07688	-4.44348
SPbeta * yokE	0.736902	-4.2395	-3.36503
SPbeta * yokF	0.753023	-6.48036	-5.31292
SPbeta * yokG	1.12608	-9.08869	-8.53997
SPbeta * yokH	0.580872	-3.61853	-3.63552
SPbeta * yokI	0.387157	-8.66908	-7.30358
SPbeta * yokJ	0.598346	-6.042	-4.97695
SPbeta * yokK	0.75562	-8.80014	-8.43972
SPbeta * yokL	0.648726	-9.0297	-8.96098
SPbeta * yolA	2.75964	-6.10979	-5.52816
SPbeta * yolB	2.51103	-5.62665	-6.55391
SPbeta * yolC	1.92446	-2.10971	-2.28591
SPbeta * yolD	1.00766	-0.398982	-1.63375
SPbeta * yolF	0.459718	-7.61152	-8.27574
SPbeta * yomD	1.46132	-2.02493	-2.40578
SPbeta * yomE	1.31139	-2.53127	-2.12247
SPbeta * yomG	0.19147	-2.02024	-2.26629
SPbeta * yomH	0.625258	-2.6826	-2.95348
SPbeta * yomI	0.156172	-2.4166	-2.36156
SPbeta * yomJ	0.7838	-6.11679	-6.7214
SPbeta * yomK	2.40897	-3.60976	-4.90761
SPbeta * yomM	1.1322	-1.93677	-2.57487
SPbeta * yomN	1.06919	-4.17649	-4.20468
SPbeta * yomO	1.19745	-4.24687	-4.5286
SPbeta * yomP	1.01452	-3.51534	-4.0315
SPbeta * yomQ	1.4088	-3.16152	-2.35762
SPbeta * yomR	1.32645	-3.47628	-3.18416
SPbeta * yomS	1.3219	-2.41501	-4.41007
SPbeta * yomT	1.42383	-3.73248	-4.29176
SPbeta * yomU	1.06708	-2.1541	-2.52348
SPbeta * yomV	1.43499	-3.45884	-3.63332
SPbeta * yomW	1.63343	-4.6919	-4.50166
SPbeta * yomX	1.39023	-3.55809	-3.1375
SPbeta * yomY	1.22541	-3.77794	-3.56849
SPbeta * yomZ	1.13124	-3.86523	-2.68966
SPbeta * yonA	1.0813	-2.63162	-2.12795
SPbeta * yonB	1.37936	-4.61211	-4.18285
SPbeta * yonC	1.38592	-4.68991	-4.84837
SPbeta * yonD	1.70274	-4.66982	-4.11195
SPbeta * yonE	0.503057	-3.96091	-3.80115
SPbeta * yonF	0.698171	-2.34571	-1.93121
SPbeta * yonH	1.42829	-1.77548	-1.69298
SPbeta * yonI	0.297935	-5.67251	-5.64988
SPbeta * yonJ	1.62173	-2.64001	-2.42038
SPbeta * yonK	1.9266	-1.99675	-1.34394
SPbeta * yonN	0.995055	-1.77315	-1.55388
SPbeta * yonO	0.50581	-2.99535	-4.09715
SPbeta * yonP	0.667698	-4.82283	-6.55255
SPbeta * yonR	1.01431	-5.76781	-7.39856
SPbeta * yonS	1.48283	-8.39209	-9.11512
SPbeta * yonT	0.303997	-1.9117	-1.83746
SPbeta * yonU	1.07011	-6.23678	-5.88087
SPbeta * yonV	0.475251	-2.52669	-2.89164
SPbeta * yopA	0.571612	-5.88087	-6.36766
SPbeta * yopB	0.363485	-4.21072	-2.1449
SPbeta * yopC	0.924118	-5.88797	-5.696
SPbeta * yopD	0.910561	-6.82828	-7.46244
SPbeta * yopE	0.451369	-3.55639	-3.47084
SPbeta * yopF	0.608106	-6.54714	-5.96218
SPbeta * yopG	0.804778	-3.67853	-2.89136
SPbeta * yopH	0.743343	-4.59527	-3.77675
SPbeta * yopI	0.891098	-4.64326	-4.92987
SPbeta * yopJ	0.689418	-5.31101	-5.96368
SPbeta * yopK	0.31691	-5.64988	-5.75036
SPbeta * yopL	1.14532	-9.66322	-9.30586
SPbeta * yopM	-0.504653	-5.85475	-5.15877
SPbeta * yopN	-0.177985	-6.28846	-5.31924
SPbeta * yopO	0.565496	-6.70526	-5.86201
SPbeta * yopP	0.247498	-6.62665	-6.04042
SPbeta * yopQ	0.557379	-6.21304	-5.00911
SPbeta * yopR	0.360252	-7.28171	-7.38323
SPbeta * yopS	-0.0778732	-5.25686	-6.53282
SPbeta * yopT	0.775576	-7.27202	-7.13188
SPbeta * yopU	0.499398	-6.4067	-7.56343
SPbeta * yopV	1.09436	-6.6276	-8.2375
SPbeta * yopW	0.309033	-5.09558	-5.94312
SPbeta * yopX	0.0372557	-2.71789	-3.26137
SPbeta * yopY	-0.276176	-2.14102	-2.41122
SPbeta * yoqA	-0.237405	-4.553	-5.01174
SPbeta * yoqB	-0.0878816	-3.31799	-2.15697
SPbeta * yoqC	-0.00709141	-3.00667	-2.11198
SPbeta * yoqD	0.331904	-3.03603	-2.20621
SPbeta * yoqE	0.409364	-4.48283	-4.02468
SPbeta * yoqF	0.315895	-1.54362	-1.45812
SPbeta * yoqG	0.223447	-5.24113	-4.86621
SPbeta * yoqH	0.0699587	-4.49709	-3.96503
SPbeta * yoqI	-0.0794831	-4.16419	-4.20078
SPbeta * yoqJ	-0.0232062	-2.36221	-2.10517
SPbeta * yoqK	0.33057	-1.936	-1.43452
SPbeta * yoqL	0.739923	-4.14526	-3.26775
SPbeta * yoqM	1.25484	-1.55047	-1.85979
SPbeta * yoqN	0.519344	-3.36191	-2.13528
SPbeta * yoqO	1.29616	-6.60729	-7.94549
SPbeta * yoqT	-0.10537	-3.01306	-4.56274
SPbeta * yorB	2.40823	-3.39993	-4.61293
SPbeta * yorC	1.36578	-4.61505	-5.22414
SPbeta * yorD	1.23672	-7.82283	-7.90689
SPbeta * yorE	0.546077	-4.467	-4.86117
SPbeta * yorF	0.772226	-4.93854	-5.01205
SPbeta * yorG	0.585597	-1.57762	-1.7525
SPbeta * yorH	0.834779	-3.002	-2.28499
SPbeta * yorI	0.643419	-2.2617	-1.30013
SPbeta * yorK	0.404434	-3.07477	-1.80849
SPbeta * yorM	0.608604	-2.08222	-1.76237
SPbeta * yorO	1.0765	-2.94575	-3.85768
SPbeta * yorP	0.882721	-0.98242	-2.11516
SPbeta * yorQ	0.865473	-2.42704	-1.97487
SPbeta * yorR	1.13492	-2.67006	-2.08716
SPbeta * yorS	0.916815	-0.990089	-2.18749
SPbeta * yorT	1.15739	-2.91148	-3.88619
SPbeta * yorW	1.81836	-0.706943	-0.939657
SPbeta * yorZ	0.246165	-1.86353	-1.69376
SPbeta * yosB	0.139229	-1.63636	-1.90583
SPbeta * yosD	0.521191	-0.870519	-1.36673
SPbeta * yosF	0.910827	-3.29572	-3.16773
SPbeta * yosI	0.586449	-3.45836	-3.59614
SPbeta * yosJ	0.835277	-2.76121	-2.56995
SPbeta * yosQ	1.11605	-1.54188	-1.55992
SPbeta * yosR	0.327185	-3.41802	-2.20818
SPbeta * yosS	0.375097	-4.06427	-3.18591
SPbeta * yosT	0.232477	-6.58589	-7.03852
SPbeta * yosU	-0.444249	-3.88833	-4.26331
SPbeta * yosV	0.672078	-3.2919	-3.07347
SPbeta * yosW	0.489344	-1.50538	-1.80622
SPbeta * yosX	0.535071	-3.27141	-2.93034
SPbeta * yotD	1.35409	-2.71088	-2.04018
SPbeta * yotE	1.12369	-4.16471	-3.79372
SPbeta * yotF	1.14699	-2.87797	-3.18823
SPbeta * yotG	1.19693	-3.73453	-3.77946
SPbeta * yotH	1.33093	-2.32677	-1.86861
SPbeta * yotJ	1.29097	-2.89207	-2.17154
SPbeta * yotK	1.37516	-2.16592	-1.88607
SPbeta * yotL	1.70261	-5.53349	-7.05697
SPbeta * yotM	1.8022	-0.562481	-3.0474
SPbeta * yotN	1.98969	-1.20905	-1.41962
SPbeta * bhlA	1.29443	-0.988533	-1.79639
SPbeta * bhlB	0.678502	-2.90906	-2.08861
SPbeta * blyA	1.19324	-1.57002	-1.57294
M * ydaH	-0.3185	1.32047	2.12191
M * ypuA	0.1893	1.57484	2.44701
M * yqjL	1.19159	2.0358	3.16708
MW * ywaC	0.327538	1.74485	2.0153
MWX * ywoA	0.365707	1.25967	1.90701
Spx * hemE	-1.65617	-0.142168	-0.117307
Spx * hemH	-1.61744	-0.106835	0.278211
Spx * hemY	-1.60643	0.0685103	0.139526
Spx * mecA	-0.157244	1.2004	0.971386
Spx * msrA	0.384164	1.41802	1.74969
Spx * yppQ	0.125532	1.21565	1.31636
Spx * nfrA	0.156612	1.194	1.412
Spx * ywcH	-0.962632	-0.0104589	0.13065
Spx * tpx	0.528328	-0.0722047	0.37358
Spx * trxA	-1.41118	0.554137	2.14298
Spx * trxB	-1.08293	0.137377	0.539587
Spx * ycnE	-0.733371	-0.28988	-0.00567613
Spx * ycnD	-0.898986	-0.154442	0.00895055
Spx * ydbP	-0.650272	0.758101	0.889133
Spx * yfiC	-1.62662	0.247466	0.660125
Spx * yfjR	-1.17779	0.640877	1.01028
Spx * yhfK	-1.46001	0.381859	0.63624
Spx * yitW	-0.208856	0.11145	0.506439
Spx * yjbC	1.35849	1.19491	1.69455
Spx * yjbD	-5.5458	1.79997	2.3977
Spx * yjbI	-0.540512	0.459155	0.794001
Spx * ykhA	-1.08625	0.203945	0.464501
Spx * ymfF	-0.188743	-0.306395	0.567399
Spx * ymfG	-0.296208	-0.305937	0.363283
Spx * ymfH	-0.44778	-0.3394	0.225456
Spx * ymzA	-0.650733	0.0982848	0.8137
Spx * yojF	-0.192733	0.824331	0.78193
Spx * yojG	-0.282257	0.772387	0.655553
Spx * yqiG	-2.52245	0.372911	0.762233
Spx * yqfY	-0.28931	0.786872	0.83779
Spx * yqjM	-2.12	-0.186021	1.08585
Spx * yraA	-2.27218	0.787491	1.05964
Spx * yrzF	0.224481	1.28253	1.64302
Spx * yrzG	-0.132093	1.08496	1.34815
Spx * ytdI	-0.178948	-0.376907	0.330486
Spx * yuaE	-0.529829	0.32292	1.26245
Spx * yugJ	-1.52512	0.206506	0.826588
Spx * yugK	-1.84859	0.0386843	0.232739
Spx * yugP	-0.858044	0.201174	0.773909
Spx * yusX	-1.4039	-0.139299	-0.363098
Spx * yusY	-1.5479	-0.130302	-0.358916
Spx * ytcI	-1.36642	-0.238737	-0.140884
Spx * ytcJ	-1.55519	-0.28317	-0.443948
Spx * yvrD	-2.6975	0.362558	0.862193
Spx * ywnF	0.449708	0.281091	1.07764
Spx * ywrO	-0.751813	0.509713	0.828469
Spx * yxcE	-0.280673	0.839755	1.10175
Spx * yxcD	-0.288082	0.906298	1.22868
K * cgeA	-4.51139	-1.52418	-0.177784
K * cgeB	-4.22819	-0.747689	0.366849
K * cgeC	-3.56502	-1.00677	-0.301574
K * cotA	-1.65805	-1.18515	0.732776
K * cotB	-1.72599	-1.05747	-0.255265
K * cotG	-3.5636	-0.660361	0.164065
K * cotS	-3.42219	-1.12614	-0.317589
K * cotSA	-3.39785	-1.35995	-0.578578
K * cotV	-3.47388	-1.31425	-0.195555
K * cotW	-3.6039	-1.27593	-0.0636253
K * cotX	-3.93126	-0.892071	-0.0408728
K * cotY	-2.16247	-0.972808	-0.457125
K * cotZ	-1.89708	-1.85232	-0.734659
K * cwlC	-1.93749	0.428882	0.219822
K * cwlH	-1.86433	-0.657726	-0.15674
K * spoVFA	-2.11079	-1.24424	-0.731773
K * spoVFB	-1.87648	-1.22226	-0.410882
K * spsA	-3.59376	-1.43117	-0.822682
K * spsB	-3.79679	-1.60368	-0.873494
K * spsC	-3.55877	-1.32883	-0.867594
K * spsD	-3.35284	-1.26976	-1.01518
K * spsE	-3.39476	-1.56361	-0.924627
K * spsF	-3.49048	-1.56172	-0.975699
K * spsG	-3.25007	-1.26875	-0.762942
K * spsI	-2.79683	-1.10535	-0.709198
K * spsJ	-2.43799	-1.47524	-1.13188
K * spsK	-2.03385	-1.39494	-1.05415
K * sspG	-3.8155	-1.2056	-0.259334
K * yabG	-2.45195	-1.8247	-1.68132
K * yeeK	-1.61961	-2.11969	-1.52337
K * yfnD	-2.607	-0.463516	-0.352216
K * yfnE	-2.71678	-0.560076	-0.441145
K * yfnF	-4.23379	-1.29117	-0.975406
K * yfnG	-4.51953	-1.22946	-1.05369
K * yfnH	-4.63523	-1.18214	-0.814937
K * yhcO	-2.71732	-1.01428	-0.359293
K * yjcB	-1.70975	-1.1591	-0.668593
K * yjcC	-2.99064	-1.57381	-0.857364
K * ykvP	-2.57541	-0.106172	0.223769
K * ykzI	-2.17949	-0.469203	-0.161357
K * ylbD	-1.7462	-1.00034	-0.790293
K * ylbE	-1.77024	-1.25908	-1.02395
K * ymaG	-1.77522	-0.813525	-0.140015
K * yodH	-2.21987	-0.749394	0.353771
K * yodI	-3.4275	-0.762918	-0.122805
K * yodU	-3.44175	2.03739	2.76065
K * yojC	-2.37947	-1.14149	-0.640989
K * ypzD	-3.59632	-0.212668	0.594663
K * ytaA	-3.68699	-1.21174	-0.0278563
K * ytcA	-2.997	-1.25665	-0.532401
K * ytcB	-2.73546	-1.52525	-0.456564
K * ytcC	-2.66798	-0.800894	0.0917878
K * ytxO	-3.03975	-0.988695	-0.260238
K * yurS	-3.98203	-1.32517	-0.385312
K * yvdO	-1.89548	-0.652811	0.0619328
K * ywrK	-3.09304	-0.659517	0.161956
K * yxeE	-2.01004	-1.7303	-0.579908
His * hisA	-2.79049	-1.68254	-0.795692
His * hisB	-2.49571	-1.62587	-0.542073
His * hisD	-2.82143	-1.75823	-0.57911
His * hisF	-2.503	-1.44832	-0.80992
His * hisG	-3.08481	-2.02091	-0.652584
His * hisH	-2.75919	-1.81872	-0.659457
His * hisI	-2.16873	-1.25742	-0.713174
His * hisZ	-2.99773	-1.80519	-0.0867627
L * acoA	-2.08361	-2.2978	-1.41406
L * acoC	-1.7805	-1.03534	-0.93833
L * acoL	-1.71143	-1.01366	-1.02481
L * bcd	-1.70186	0.0268095	-0.667057
L * bkdAA	-2.28204	-0.253131	-0.584422
L * bkdAB	-2.14112	-0.0777666	-0.452998
L * bkdB	-1.83784	0.0434612	-0.119432
L * bkdR	-2.37887	-0.0607233	-0.763114
L * buk	-1.855	-0.46027	-0.698155
L * lpdV	-2.09349	-0.430256	-0.674376
AhrC * argC	-0.721865	-2.3993	0.162739
AhrC * argJ	-1.12704	-2.56144	-0.326799
AhrC * argB	-1.1693	-2.81448	-0.551733
AhrC * argD	-0.72977	-3	-0.824554
AhrC * carA	-0.318368	-2.64879	-0.795692
AhrC * carB	-0.169074	-2.35044	-0.971818
AhrC * argF	-0.192436	-1.85571	-0.928283
AhrC * argH	-0.269727	-1.72271	-0.297254
IolR * iolD	-1.53754	-1.71713	-0.722602
IolR * iolE	-1.23245	-1.64036	-0.70293
OhrR * ohrA	-0.596158	-1.92174	-1.63333
yhzA	6.20966	0.932905	0.725849
yezD	6.15993	-1.40224	0.267012
ygaN	5.93373	0.140142	-0.0873246
senS	5.27818	0.229264	0.0768829
ywcI	4.89109	-0.712733	-0.0802506
ybfI	4.79053	1.61314	1.52651
yfmH	4.18548	0.574625	1.394
ybfH	3.88397	1.27494	1.11474
levD	3.77088	-0.0980937	0.360121
levE	3.71259	-0.120775	0.154203
ykvI	3.70986	-0.160449	0.0999864
yqhV	3.64876	-0.837893	-1.22076
sacT	3.64627	-0.156316	-0.117735
yjnA	3.5957	-0.713797	-0.169366
ywhE	3.56032	-0.873679	-0.276398
rapH	3.52914	0.810621	1.56558
ytvI	3.40311	-0.736212	-0.380358
levG	3.37877	-0.353131	-0.0658937
ywkC	3.31727	0.038394	0.272374
yoaQ	3.25045	-0.427	0.239777
levF	3.16306	-0.391796	-0.0703908
yfmG	3.09267	0.0466028	0.98083
tetL	2.95694	0.0509219	-0.181062
ynzB	2.95051	-0.139612	0.320781
luxS	2.9427	0.416476	1.01603
rapA	2.85804	0.946668	0.728092
yhjR	2.84403	-1.64974	0.198536
yufS	2.81412	-0.426942	-0.0865891
katX	2.80604	-1.0435	-0.0322657
yppD	2.79601	0.130303	0.125563
kbl	2.63291	-0.402467	-0.602905
yqeW	2.5526	0.123445	-0.753523
yfmA	2.50551	0.146929	0.808088
sacC	2.48757	-0.132826	0.153658
yncM	2.44429	1.49726	0.4564
yitJ	2.40112	0.273886	-0.896075
ppsA	2.36699	0.536875	0.756557
ppsE	2.36137	-0.0355447	0.384105
ylaM	2.35411	0.0144934	0.163306
yydF	2.34484	-0.54796	0.155577
pel	2.31804	0.892497	1.10348
yjdB	2.29965	-0.02178	0.524047
yutG	2.26731	-0.341367	-0.0716891
yetJ	2.25581	0.0726272	0.237197
yhcL	2.24697	-0.3708	-0.330042
yvqJ	2.23774	0.577041	0.783046
tdh	2.21939	-0.758794	-0.586038
pstS	2.20452	0.570346	0.951486
ytoI	2.17871	0.10575	-0.28162
yqfZ	2.14875	0.280002	0.435671
yqxI	2.1469	-0.529482	-0.210507
yneE	2.13354	0.234137	0.19486
rapF	2.10333	0.471028	0.493992
ybfG	2.06607	1.97543	2.02506
yweA	2.06234	1.15153	1.13563
nprE	2.06231	-0.024722	0.319429
ppsB	2.04944	0.141306	0.557784
yhzC	2.04789	1.88673	2.12884
metE	2.03593	-0.0765998	-0.0442855
yrpD	1.98131	-0.100634	1.16341
yqgW	1.97485	0.773136	1.14797
yrbD	1.97423	-0.217949	0.00365021
ydhU	1.95973	-0.851166	-0.200018
asnO	1.95936	-2.09259	-0.227157
cspD	1.9365	2.33464	2.05205
ykrT	1.91426	0.162064	0.295225
yqxJ	1.91341	-0.267705	-0.00837264
ywlB	1.90408	-0.321435	-0.525676
yndN	1.89393	0.72736	1.10833
ywcE	1.89021	0.578997	0.577038
yukE	1.88763	0.882492	1.38772
yhjM	1.88689	0.355366	0.977883
oppA	1.87842	0.045853	-0.350621
dhaS	1.86323	0.0102786	0.331243
yvmC	1.82954	0.268171	-0.0655011
clpE	1.82014	0.980008	0.830366
ytzE	1.81019	1.16512	1.66056
yugT	1.79426	-0.578255	-0.473951
yxkC	1.75767	2.77623	2.25365
yxjJ	1.75252	2.24177	3.44873
ppsD	1.74734	-0.109634	0.233225
yuaF	1.73112	0.507306	1.15802
ykrS	1.72345	-0.00548303	-0.0311941
yobB	1.72164	-0.458716	-0.146851
yozM	1.71281	-0.278747	-0.0674399
proJ	1.69583	-0.680097	-0.158032
rapK	1.68838	1.34998	1.54944
appF	1.67224	0.0766047	1.17856
yesJ	1.66543	-0.741501	-0.498709
yviE	1.64407	1.96179	2.06149
ypzC	1.63478	0.044935	0.77841
yetK	1.61243	0.15114	0.122063
yrdA	1.60669	-0.34175	-0.0746335
ydeH	1.60576	0.846874	0.590677
yjgC	-3.03832	-1.0375	-0.494888
yjbQ	-2.97336	0.386697	0.292102
yojB	-2.91311	-1.50638	-0.617949
aprX	-2.89232	0.0113716	0.164031
ybxG	-2.84961	0.0403127	0.431156
yvgN	-2.66398	0.516425	0.834595
des	-2.6312	-0.257862	-0.576942
yhcP	-2.59632	-1.32176	-0.576942
yhfD	-2.57691	-0.716465	-0.524625
ywhK	-2.55713	-0.133279	-0.00870643
yyaE	-2.44733	-0.467015	-0.909399
yycJ	-2.41094	-0.599783	-1.0407
ycdF	-2.40441	-0.572179	-0.705743
yfiB	-2.37363	0.0338588	0.796119
ytiP	-2.34723	-1.32823	0.227922
ygxB	-2.3056	-0.519046	0.623124
ytkC	-2.2485	-0.45132	-0.0926324
guaC	-2.20678	-0.695762	0.372766
rnhC	-2.20674	0.272664	-0.305248
panB	-2.19886	-0.365686	-0.103958
yqiC	-2.18497	-1.05521	-1.59349
yqiD	-2.16327	-1.11363	-1.59335
ycdG	-2.14047	-0.527394	-0.571079
yjgD	-2.13108	-0.644623	-0.258707
panC	-2.12698	-0.535429	-0.848011
katE	-2.11752	-0.779695	-0.848011
yvgP	-2.11139	-0.113218	0.754412
yhfH	-2.1078	1.38081	-1.313
yrbC	-2.08135	0.206935	0.433778
folC	-2.07242	-1.25653	-1.08443
gabD	-2.06472	0.730688	0.781751
yclG	-2.05785	-0.271223	-0.072771
purE	-2.05661	-1.02171	-1.06667
yhgE	-2.05599	-0.237053	-0.798751
mleN	-2.05487	0.0950332	-0.235518
yocC	-2.03722	-0.697071	-0.256741
fabHB	-2.03089	-1.82254	-0.776083
ytbD	-2.00686	0.354155	-0.982107
valS	-2.002	-1.12737	-1.0055
ydhL	-1.98782	0.0401911	-0.262486
pbuG	-1.97968	-0.788041	-0.53529
recG	-1.9568	-0.694835	-0.926143
ydhM	-1.95601	0.509584	0.0859503
yycI	-1.93911	-0.541947	-0.978369
pbpF	-1.93256	-0.0960928	-0.0392412
ydhK	-1.9167	-0.628415	-0.46911
gltA	-1.90846	-0.378163	-0.538416
ydfO	-1.9064	-0.71476	-1.04875
ebrA	-1.90169	0.413948	0.056921
yycG	-1.88995	-0.300265	-1.02232
yrrB	-1.88044	-0.609545	-0.922465
yrvO	-1.87753	-0.578866	-0.737126
yfjN	-1.87663	-0.169761	-0.797881
yxaC	-1.87486	0.0958659	0.0622599
ywhL	-1.87171	-0.0100811	0.0992458
glpK	-1.8581	-0.36571	0.114864
moeA	-1.85548	-0.566877	-0.576569
yrrM	-1.85524	-0.523103	-0.896854
yugK	-1.84859	0.0386843	0.232739
yfhI	-1.84729	-0.458835	-0.586218
panD	-1.84323	-0.63424	-0.452892
yqeT	-1.83102	-1.08614	-1.30682
ycbD	-1.82368	-0.261137	-0.529413
ywmF	-1.80744	0.476205	0.0926224
yybP	-1.80504	-0.0272583	-0.0465783
ykzE	-1.80019	-1.66667	-1.61473
yrhG	-1.79957	0.107358	-2.02585
yesE	-1.7984	-0.193932	-0.85186
fruA	-1.79202	-0.370639	-0.693598
ydhN	-1.79132	0.370097	0.0197256
yclM	-1.78908	1.92683	2.00333
yqiB	-1.77992	-0.676918	-1.04737
ydzH	-1.77822	0.0994748	0.239728
ybgE	-1.77673	0.488902	0.0488779
yybT	-1.77152	-0.642647	-0.539065
trmU	-1.76577	-0.28901	-0.385092
yyxA	-1.76307	-0.614381	-1.07245
ytzG	-1.76053	-0.440622	-0.710842
yvjA	-1.75675	-0.228695	-0.778688
dnaJ	-1.73932	-0.780322	-1.06853
yxlF	-1.73915	-0.229698	-0.802244
yrrN	-1.73327	-0.556846	-0.975122
yhdB	-1.72934	0.000100985	0.528508
yuaA	-1.72798	-0.619426	-0.476505
moeB	-1.72077	-0.533611	-0.432188
yabM	-1.71944	0.10182	-0.372487
yflA	-1.71623	-0.667913	-0.668998
yhdN	-1.71039	0.105258	-0.176647
purM	-1.70822	-0.841887	-1.14686
yphC	-1.70788	-0.421258	-0.991504
yycH	-1.70054	-0.452201	-0.997962
ykoK	-1.69445	0.264416	0.0590322
polA	-1.69392	-0.391979	-0.715818
purH	-1.6925	-0.327391	-0.757607
yjzB	-1.68415	-0.213694	0.0555798
yubG	-1.68188	-0.592165	-0.582598
purK	-1.67709	-0.631288	-0.753466
yrrC	-1.67421	-0.581864	-0.805341
yetN	-1.66696	0.286534	-0.209261
smc	-1.6603	-1.13682	-1.14822
ansB	-1.65971	-0.197865	-0.0647615
yacC	-1.6569	-0.170827	-0.323684
ebrB	-1.65663	0.318134	0.0758886
ykcA	-1.6557	-0.107368	0.28891
fruK	-1.65537	-0.208694	-0.548136
yqeH	-1.65455	-0.537305	-1.17196
ypsC	-1.65305	-0.492302	-0.786978
ylmB	-1.65277	0.444526	0.509412
araA	-1.64911	-0.49147	-0.371466
sdaAA	-1.64605	-0.450472	-0.69881
mmr	-1.64354	-0.448069	-0.813026
ytcP	-1.63916	-0.52558	-0.619381
ywtG	-1.63853	0.134497	-0.285812
yfiL	-1.63591	-0.154634	-0.755738
yqjP	-1.6343	-0.451853	-0.501395
glpD	-1.62577	-0.115728	-0.558063
yvgX	-1.62295	-0.73542	-1.25691
ykuT	-1.61983	0.374118	0.180598
ydaD	-1.6079	-0.265674	0.0471056
mobB	-1.59978	-0.398227	-0.435528
ycbC	-1.59933	0.129995	0.163834
tagH	-1.59803	-0.190119	-0.531163
yyzE	-1.59713	-0.826173	-0.570621
yrvE	-1.59459	-0.187948	-0.656778
gpsA	-1.59186	-0.476017	-0.897812
glpT	-1.58576	-0.185611	-0.131708
thdF	-1.58499	-0.258943	-1.00319
ask	0.328442	1.97889	0.989183
cgeE	0.910712	1.89829	2.61445
hom	-0.480163	1.58772	1.11722
lysC	0.147797	2.79453	1.60533
maf	1.4935	0.72111	1.72204
rpmH	1.23747	2.16109	2.09526
sigV	0.368061	1.41022	1.88778
sodA	0.92301	1.11313	1.86941
thiC	1.07868	2.06504	1.82722
thrB	-0.436354	1.76223	1.22229
thrC	-0.315199	1.76041	1.22068
thrZ	-1.44043	2.19272	2.32413
yjbA	1.36519	-0.931068	2.06687
ykoW	1.28189	2.77304	2.63536
yobU	0.0595168	1.82282	1.77896
yocH	1.15329	1.44785	0.73114
yqaR	1.28039	2.01992	2.4441
yqaS	0.13919	1.09578	1.87906
yqbG	0.420933	2.69458	3.01922
yqbH	-0.0305898	1.42809	1.77233
yrzF	0.224481	1.28253	1.64302
ysbA	0.0964868	2.20302	4.84462
ysbB	-0.0110306	2.15477	4.03024
yuiG	0.23406	1.72961	1.42321
yusU	1.41939	0.146612	1.62783
yvzD	0.629088	1.59643	1.8385
ywbG	-0.446541	1.15198	1.58561
ywbH	-0.329468	1.08267	1.90092
ywhA	-0.498328	1.63156	1.02413
yxkH	0.9297	3.0701	2.9046
ligB	-0.302535	-3.34671	-3.96368
mtbP	1.09066	-2.84875	-3.25774
yitM	0.813812	-2.52924	-1.5021
yjzC	-0.161922	-2.02917	-1.00903
ykzE	-1.80019	-1.66667	-1.61473
yozP	0.437615	-3.51821	-2.10067
yrhD	-0.643481	0.226204	-1.85458
yrhE	-1.031	-0.130639	-2.01864
yrhG	-1.79957	0.107358	-2.02585
ysfC	0.19947	-0.725072	-1.80406
ysfD	0.186281	-0.393172	-1.62659
ytpP	-0.532435	-1.58189	-1.25354
ytpQ	-0.524334	-2.27882	-2.35262
ytpR	-0.647294	-1.83025	-2.35105
ytzD	-0.461932	-1.99124	-0.0269937
yxeQ	1.0412	-1.1332	-1.65963
yxeR	0.690399	-0.693621	-1.66751
